# Supplementary material
Source: Springer Nature journal article supplement (https://www.springermedizin.de/resource/supplementary/12865_2013_562_MOESM7_ESM.pdf/9428292)

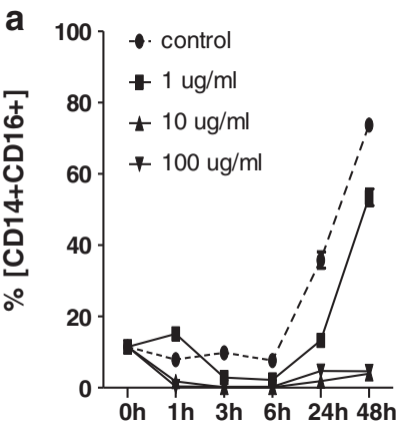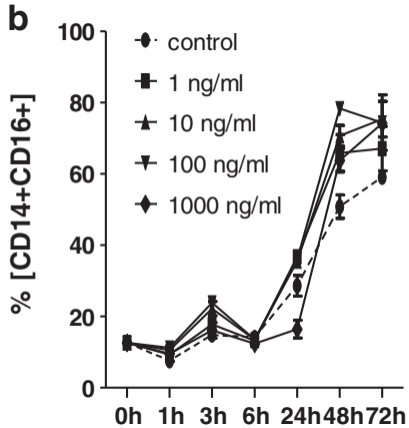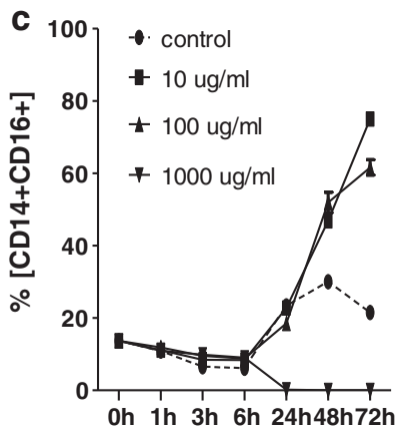

Supplement: MOESM7 [file 9428292]
